# Supplementary material for: CdS quantum dots and tungsten carbide supported on anatase–rutile composite TiO2 for highly efficient visible-light-driven photocatalytic H2 evolution from water
Source: Royal Society of Chemistry journal article supplement (doi:10.1039/c5cy01634g), 2015-11-09
Supplement: c5cy01634g1.pdf [file c5cy01634g1.pdf]

Supporting Information

**CdS quantum dots and tungsten carbide supported on anatase-rutile composite TiO<sub>2</sub> for highly efficient visible-light-driven photocatalytic H<sub>2</sub> evolution from water**

Yun-xiang Pan,<sup>a,c</sup> Tianhua Zhou,<sup>a,b</sup> Jianyu Han,<sup>a</sup> Jindui Hong,<sup>a</sup> Yabo Wang,<sup>a</sup> Wei Zhang<sup>\*a,d</sup> and Rong Xu<sup>\*a,b</sup>

<sup>a</sup> School of Chemical & Biomedical Engineering, Nanyang Technological University, 62 Nanyang Drive, Singapore 637459. Fax: (+65) 6794 7553. E-mail: rxu@ntu.edu.sg

<sup>b</sup> SinBeRISE CREATE, National Research Foundation, CREATE Tower level 11, 1 Create Way, University Town, National University of Singapore, Singapore 138602

<sup>c</sup> School of Chemistry and Chemical Engineering, Hefei University of Technology, HeFei AnHui 230009, China

<sup>d</sup> School of Chemistry & Chemical Engineering, Shaanxi Normal University, Xi'an 710119, China.  
Email: zw@snnu.edu.cn

\*Corresponding authors: zw@snnu.edu.cn (W. Zhang) and rxu@ntu.edu.sg (R. Xu)

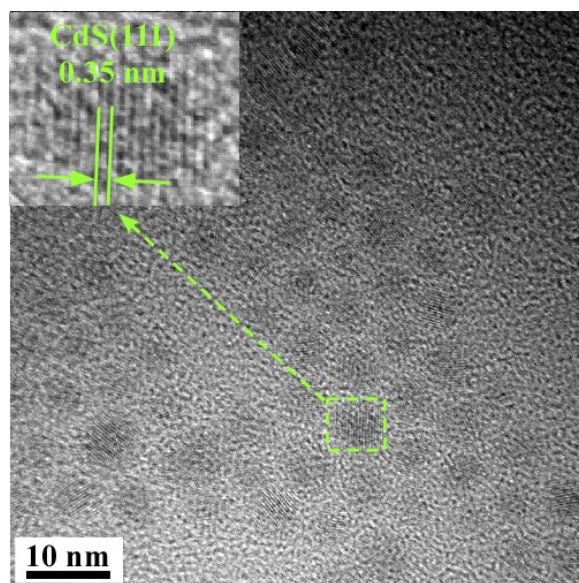

Fig. S1 HRTEM image the water-soluble CdS QDs.

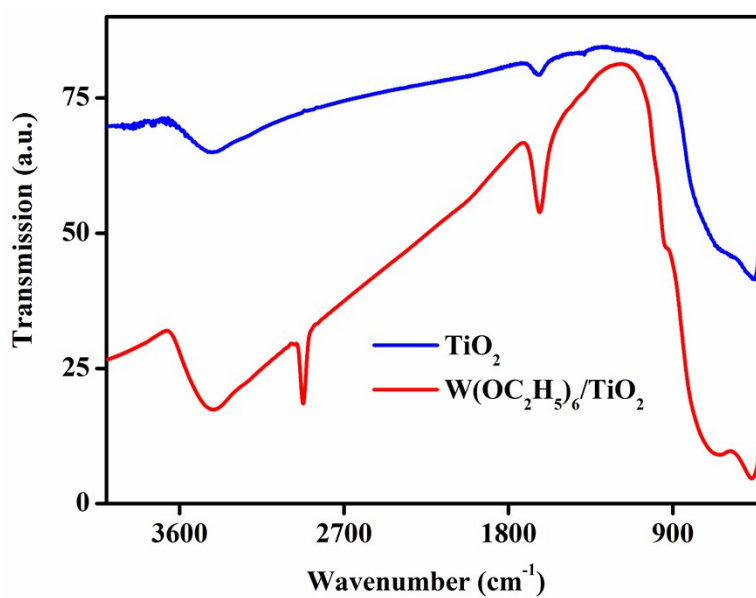

Fig. S2 FTIR spectra of the pristine  $\text{TiO}_2$  and  $\text{W}(\text{OC}_2\text{H}_5)_6/\text{TiO}_2$ .

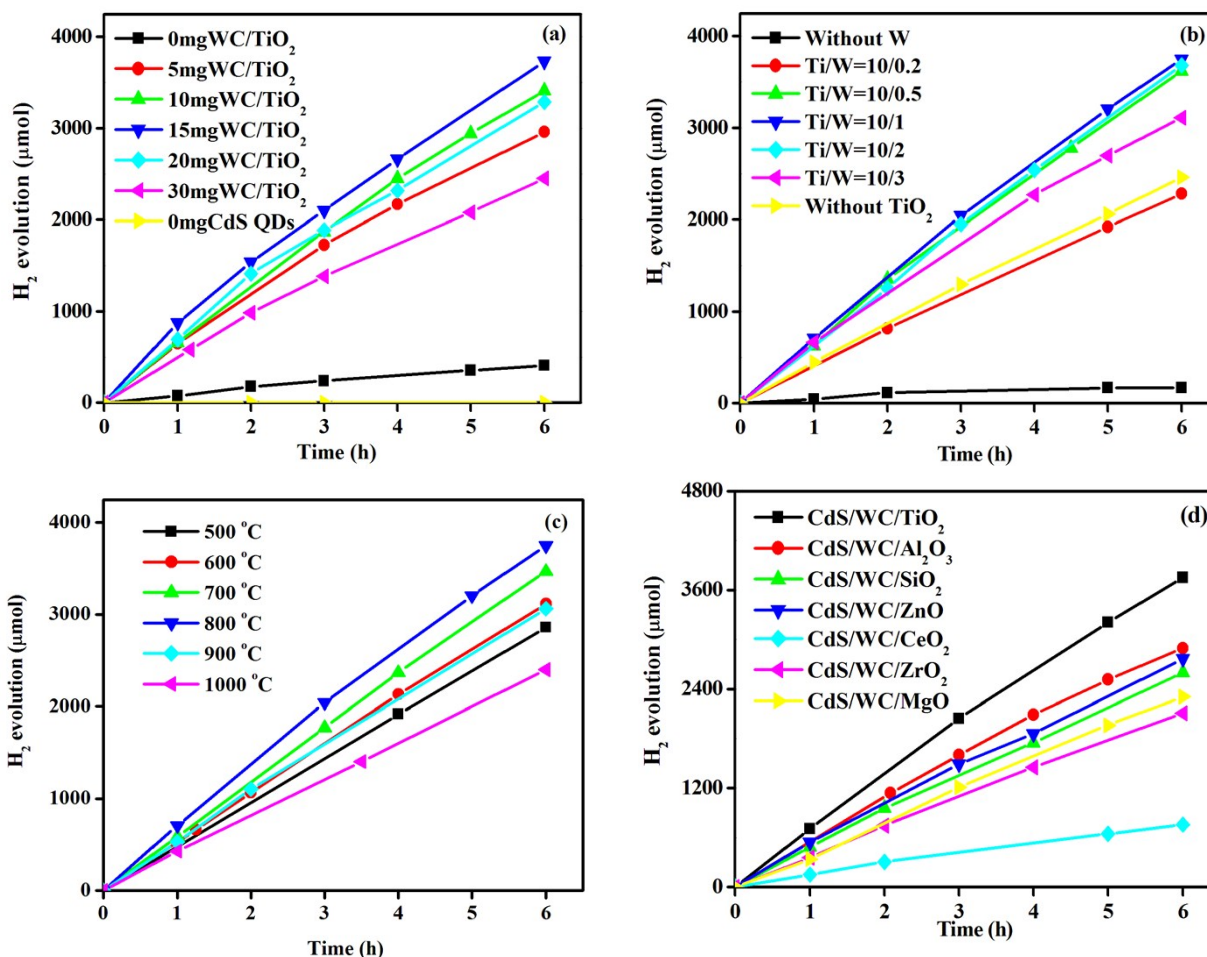

**Fig. S3** Time-course H<sub>2</sub> evolution with (a) different amount of WC/TiO<sub>2</sub> (calcined at 800 °C, Ti/W molar ratio: 10/1) by fixing the amount of CdS QDs at 20 mg, (b) different molar ratio of Ti/W by fixing the amounts of WC/TiO<sub>2</sub> (calcined at 800 °C) and CdS QDs at 15 and 20 mg, respectively, (c) different calcination temperature by fixing the amounts of WC/TiO<sub>2</sub> (Ti/W molar ratio: 10/1) and CdS QDs at 15 and 20 mg, respectively, and (d) different metal oxide supports by fixing the amount of WC/oxide (15 mg) and CdS QDs (20 mg). Reaction conditions: 100 mL aqueous solution with 20 vol% lactic acid, 300 W Xe lamp ( $\lambda > 420$  nm).

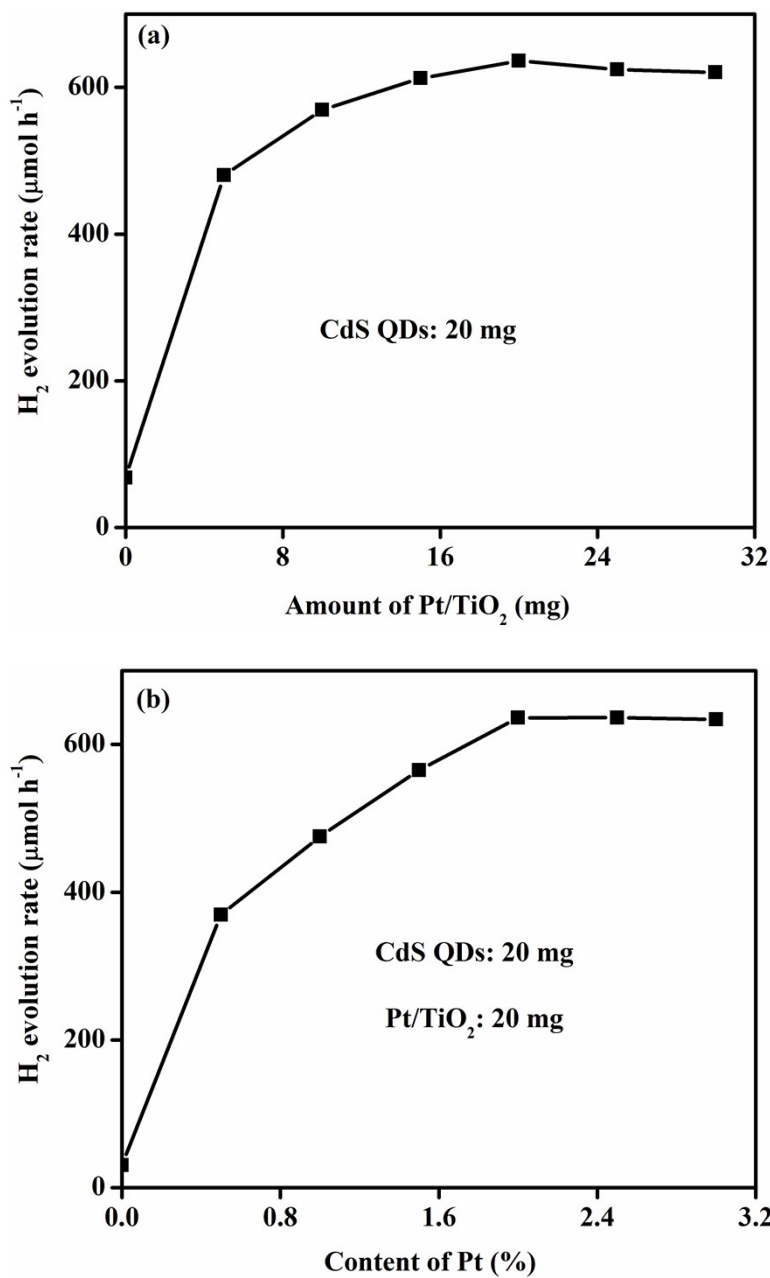

**Fig. S4** (a) H<sub>2</sub> evolution rate on CdS/Pt/TiO<sub>2</sub> with different amount of Pt/TiO<sub>2</sub> (content of Pt: 2%) by fixing the amount of CdS QDs at 20 mg, and (b) H<sub>2</sub> evolution rate on CdS/Pt/TiO<sub>2</sub> with different content of Pt by fixing the amounts of CdS QDs and Pt/TiO<sub>2</sub> at 20 mg. Reaction conditions: 100 mL aqueous solution with 20 vol% lactic acid, 300 W Xe lamp ( $\lambda > 420$  nm), irradiation time 6 h.

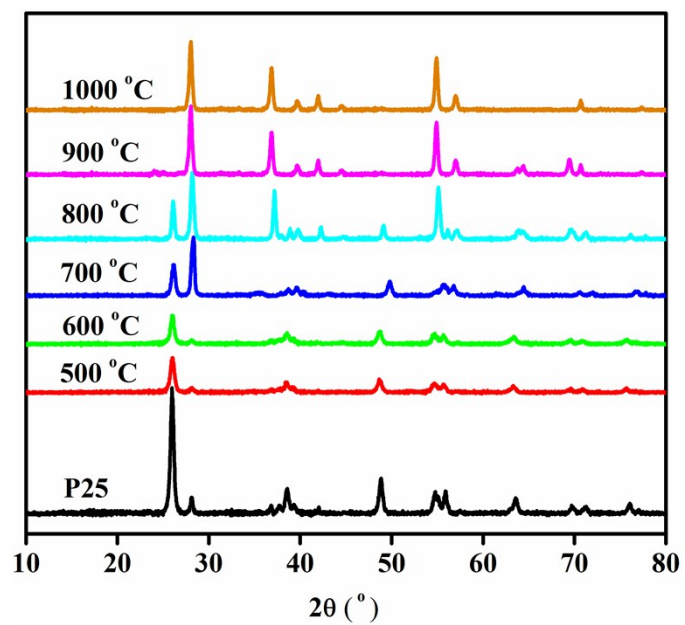

**Fig. S5** XRD patterns of WC/TiO<sub>2</sub> calcined at different temperatures.

**Table S1** Comparison of the photocatalytic H<sub>2</sub> evolution activity of CdS/WC/TiO<sub>2</sub> with those photocatalysts using Pt as the co-catalyst reported in the literatures.

| Photocatalyst                         | Catalyst amount (mg); Reaction solution (mL) | Sacrificial reagent                                            | Light source                | H <sub>2</sub> evolution rate (μmol/h) | QE (%); wavelength (nm) | Ref.      |
|---------------------------------------|----------------------------------------------|----------------------------------------------------------------|-----------------------------|----------------------------------------|-------------------------|-----------|
| CdS/WC/TiO <sub>2</sub>               | 35; 100                                      | 20 vol% lactic acid                                            | 300 W Xe, λ>420 nm          | 624.9                                  | 32.1%; 460 nm           | This work |
| CdS/Pt/Ga <sub>2</sub> O <sub>3</sub> | 100; 100                                     | 20 vol% lactic acid                                            | 300 W Xe, λ>420 nm          | 995.8                                  | 43.6%; 460 nm           | 1         |
| CdS/Pt/In <sub>2</sub> O <sub>3</sub> |                                              |                                                                |                             | 1032.2                                 | 45.3%; 460 nm           |           |
| CdS/Pt/TiO <sub>2</sub>               |                                              |                                                                |                             | 603.0                                  | 37.6%; 460 nm           |           |
| ZnO/Pt/CdS                            | 20; 75                                       | 0.1M Na <sub>2</sub> S, 0.1M Na <sub>2</sub> SO <sub>3</sub>   | 450 W Xe, λ>420 nm          | 224                                    | 11.9% <sup>a</sup>      | 2         |
|                                       |                                              | benzyl alcohol                                                 |                             | 632                                    | 34.5% <sup>a</sup>      |           |
| Pt/CdS/TiO <sub>2</sub>               | 100; 100                                     | 0.1M Na <sub>2</sub> S, 0.02M Na <sub>2</sub> SO <sub>3</sub>  | 500 W, Hg-arc, λ>420 nm     | ~560                                   | -                       | 3         |
| CdS/Al <sub>2</sub> O <sub>3</sub>    | 100; 50                                      | 0.25M Na <sub>2</sub> S, 0.35M Na <sub>2</sub> SO <sub>3</sub> | 500 W, tungsten-Hg λ>420 nm | 724                                    | 11% <sup>a</sup>        | 4         |
| CdS/ZnO                               |                                              |                                                                |                             | 1008                                   | 15% <sup>a</sup>        |           |
| CdS/Pt/TiO <sub>2</sub>               | 40; 80                                       | 10 vol% lactic acid                                            | 350 W Xe arc, λ>420 nm      | 265                                    | 13.9%; 420 nm           | 5         |
| CdS/Pt/ZnO                            | 200; 300                                     | 0.1 M Na <sub>2</sub> S, 0.1 M Na <sub>2</sub> SO <sub>3</sub> | 450 W Xe arc, λ>420 nm      | 774                                    | 3.2% <sup>a</sup>       | 6         |

<sup>a</sup> No wavelength specified.

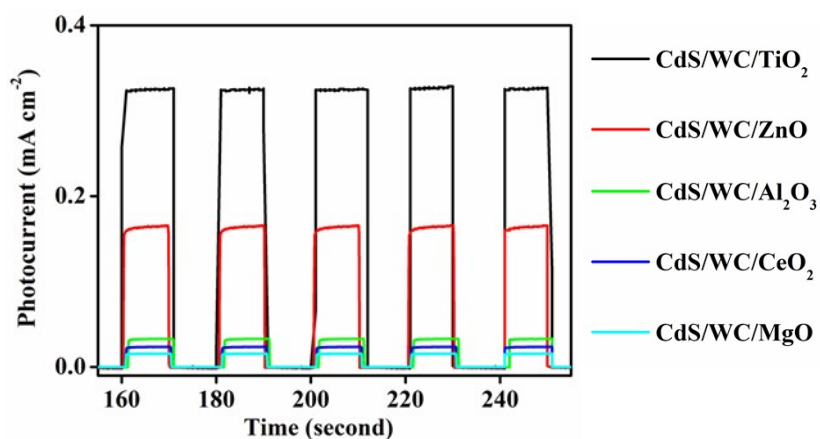

**Fig. S6** Transient photocurrent responses of CdS/WC/Al<sub>2</sub>O<sub>3</sub>, CdS/WC/ZnO, CdS/WC/CeO<sub>2</sub>, CdS/WC/MgO and CdS/WC/TiO<sub>2</sub> in 0.2 M Na<sub>2</sub>SO<sub>4</sub> aqueous solution containing 20 vol% lactic acid under visible light irradiation ( $\lambda > 420$  nm).

## References

- 1 Y. X. Pan, H. Zhuang, J. Hong, Z. Fang, H. Liu, B. Liu, Y. Huang and R. Xu, *ChemSusChem*, 2014, **7**, 2537-2544.
- 2 S. R. Lingampalli, U. K. Gautam and C. N. R. Rao, *Energy Environ. Sci.*, 2013, **6**, 3589-3594.
- 3 J. S. Jang, S. H. Choi, H. G. Kim and J. S. Lee, *J. Phys. Chem. C*, 2008, **112**, 17200–17205.
- 4 D. Barpuzary, Z. Khan, N. Vinothkumar, M. De and M. Qureshi, *J. Phys. Chem. C*, 2012, **116**, 150-156.
- 5 R. Marschall and L. Wang, *Catal. Today*, 2014, **115**, 111-135.
- 6 X. Wang, G. Liu, Z. G. Chen, F. Li, L. Wang, G. Q. Lu and H. M. Cheng, *Chem. Commun.*, 2009, 3452-3454.
